# Supplementary material for: High-Performance Ethylene Glycol Sensor Based on Imine Covalent Organic Frameworks
Source: MDPI journal article supplement (doi:10.3390/nano13243103), 2023-12-08
Supplement: s1 [file s1]

# Supplementay Materials

Shiwei Liu <sup>1</sup>, Guojie Zhang <sup>1</sup>, Weiyu Zhang <sup>1</sup>, Ning Tian <sup>1,\*</sup>, Qihua Sun <sup>1</sup> and Zhaofeng Wu <sup>1,2,\*</sup>

- <sup>1</sup> Xinjiang Key Laboratory of Solid-State Physics and Devices, Urumqi 830046, China; 107552103375@stu.xju.edu.cn (S.L.); 107552103366@stu.xju.edu.cn (G.Z.); 107556522113@stu.xju.edu.cn (W.Z.); sunqh@xju.edu.cn (Q.S.)  
<sup>2</sup> School of Physics Science and Technology, Xinjiang University, Urumqi 830046, China  
\* Correspondence: tn@xju.edu.cn (N.T.); wuzf@xju.edu.cn (Z.W.)

## Materials and Reagents:

1,3,5-tris(4-aminophenyl) benzene (TAPB (99.5%)) and 4,4'-Biphenyldicarbaldehyde (BPDA (99.5%)) were purchased from Shanghai Tensus Biotech Co., Ltd. (Shanghai, China). Benzaldehyde (C<sub>7</sub>H<sub>6</sub>O (99%)), DMSO (99%), NMP (99%), toluene (C<sub>7</sub>H<sub>8</sub> (99.5%)) and acetonitrile (C<sub>2</sub>H<sub>3</sub>N (99%)) were purchased from Shanghai Boer Chemical Reagents Co., Ltd. (Shanghai, China). Ethyl acetate (C<sub>4</sub>H<sub>8</sub>O<sub>2</sub> (99.5%)) and methanol (CH<sub>4</sub>O (99.5%)) were purchased from Tianjin Xinbote Chemical Co., Ltd. (Tientsin, China). 1,4-Dioxane (C<sub>4</sub>H<sub>8</sub>O<sub>2</sub> (99.5%)) was purchased from Tianjin Zhongyuan Chemical Reagent Co., Ltd. (Tientsin, China). 1,3,5-Trimethylbenzene (C<sub>9</sub>H<sub>12</sub> (97%)) was purchased from Shanghai Mclean Biochemical Technology Co., Ltd. (Shanghai, China). scandium(III) trifluoromethanesulfonate Sc(OTf)<sub>3</sub> (99%) was purchased from Beijing Biotech Pharmaceutical Co., Ltd. (Beijing, China). Formaldehyde (CH<sub>2</sub>O (37%)), ethylene glycol (C<sub>2</sub>H<sub>6</sub>O (99.9%)), acetone (C<sub>3</sub>H<sub>6</sub>O (99.9%)), NH<sub>3</sub> (25%), ethylene glycol (C<sub>2</sub>H<sub>6</sub>O<sub>2</sub> (99%)) and aniline (C<sub>6</sub>H<sub>7</sub>N (99.9%)) were purchased from Sinopharm Chemical Reagent Co., Ltd. (Beijing, China). Hydrogen peroxide (H<sub>2</sub>O<sub>2</sub> (30%)) HCl (37%), Hexane (C<sub>6</sub>H<sub>14</sub> (99.5%)) and HNO<sub>3</sub> (65%) were purchased from Aladdin Reagent Co., Ltd. (Shanghai, China). Phenol (C<sub>6</sub>H<sub>6</sub>O (99%)) was purchased from Tianjin Damao Chemical Reagent Factory (Tientsin, China). Trimethylamine solution (C<sub>3</sub>H<sub>9</sub>N (33%)) was purchased from Tianjin Kwangfu Fine Chemical Industry Research Institute (Tientsin, China).

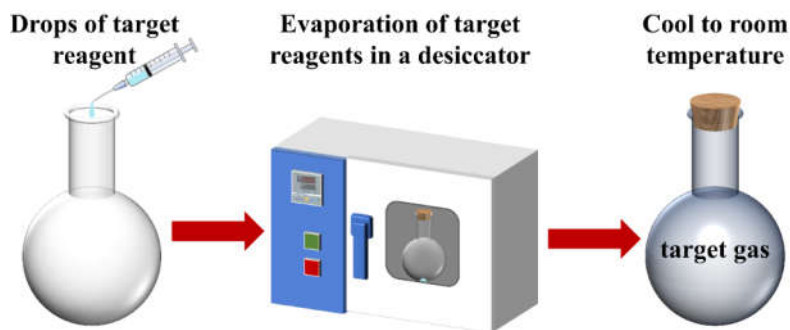

**Figure S1.** Target gas preparation diagram.

All target gases were prepared by thermal evaporation using the following equation:

$$Q = (V \times C \times M) / (22.4 \times D \times \rho) \times 10^{-9} \times (273 + T_R) / (273 + T_C)$$

where Q is the liquid volume of the target reagent (mL), V is the volume of the sealed experimental container (mL), C is the concentration of the prepared target atmosphere (ppm), M is the molecular weight of the target reagent, d is the purity of the target reagent (wt %),  $\rho$  is the density of the target reagent (g/cm<sup>3</sup>),  $T_R$  is the ambient temperature, and  $T_C$  is the actual temperature inside the sealed experimental container. The target gas is prepared by pumping the target liquid into a sealed experimental vessel and heating it.

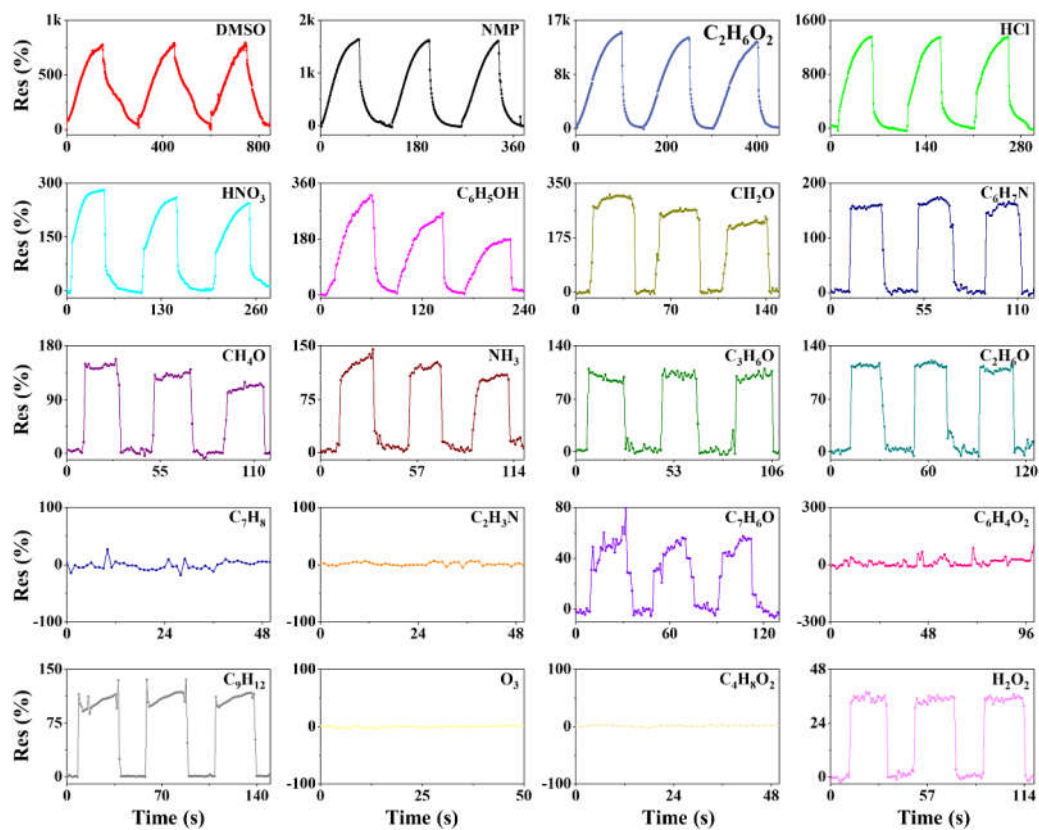

**Figure S2.** Response-recovery curves of COF<sub>TB</sub> toward 20 different atmospheres (500 ppm).

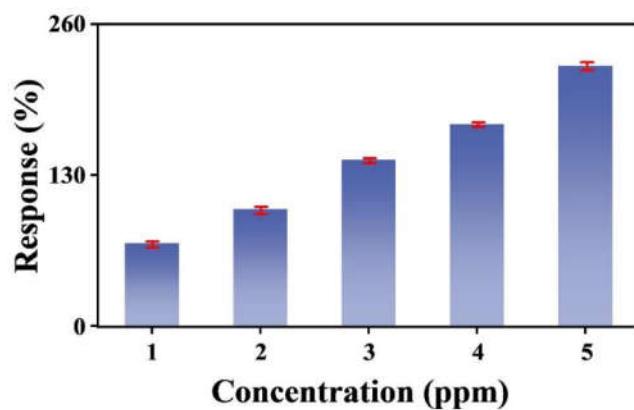

**Figure S3.** Histogram of averages and error bars based on three responses.

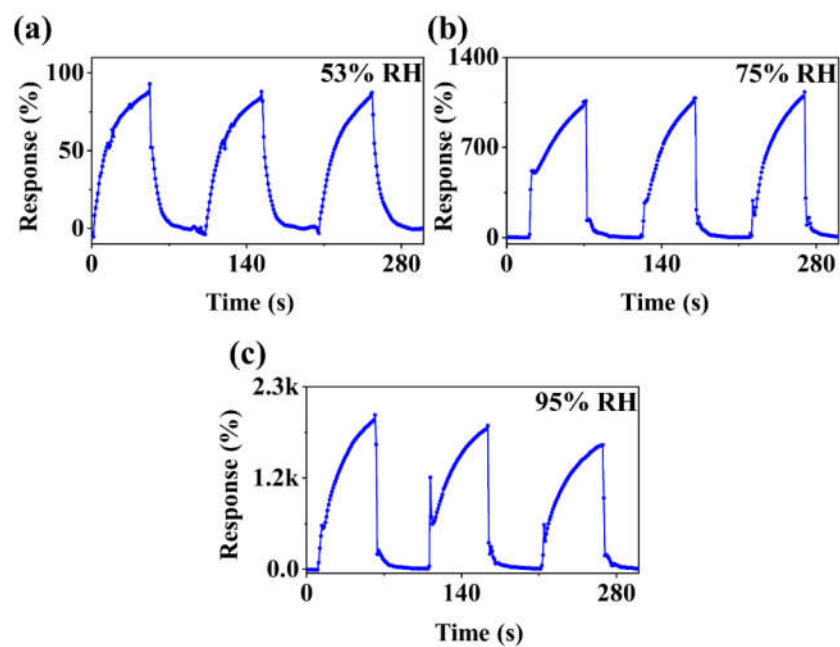

Figure S4. (a–c) Sensing curves of COF<sub>TB</sub> for different humidity levels.

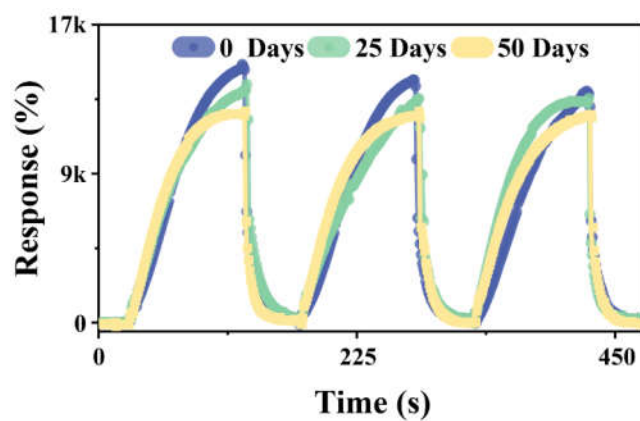

Figure S5. Long-term stability of COF<sub>TB</sub> to 500 ppm C<sub>2</sub>H<sub>6</sub>O<sub>2</sub>.

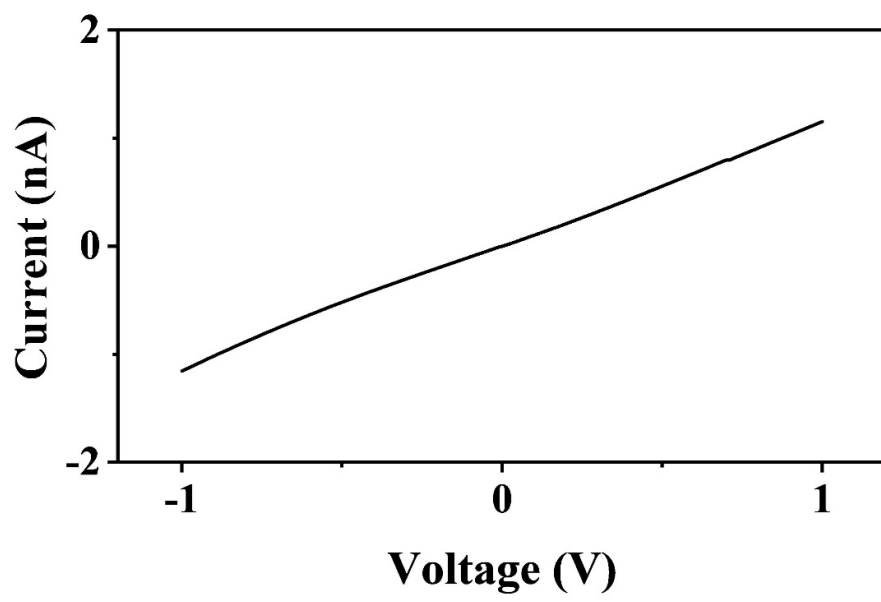

Figure S6. I-V curves of COF<sub>TB</sub>.
